# Supplementary material
Source: ML conference proceedings conference paper supplement (https://proceedings.neurips.cc/paper_files/paper/2013/hash/69a5b5995110b36a9a347898d97a610e-Abstract.html)
Supplement: Supplementary file [file 69a5b5995110b36a9a347898d97a610e-Supplemental.zip]

## A Correctness of Algorithm 2

In this appendix we show:

**Theorem A.1.** *For any graph  $G$  and any pair of vertices  $s$  and  $t$  in the same connected component of  $G$ , Algorithm 2 computes a basis for the  $s$ - $t$  path space.*

*Proof:* We adopt the conventions of Section 2, so that  $G$  is a bipartite graph with  $m$  blue vertices,  $n$  red ones, and  $e$  edges oriented from blue to red. Recall the isomorphism, observed in the proof of Theorem 2.6 of the  $\mathbb{Z}$ -group of the polynomials  $L_C(\cdot)$  and the oriented cycle space  $H_1(G, \mathbb{Z})$ .

Let  $c$ , be the number of connected components of  $G$  and define  $\beta_1(G) = e - n - m + c$  (the first Betti number of the graph). Some standard facts are that: (i) the rank of  $H_1(G, \mathbb{Z})$  is  $\beta_1(G)$ ; (ii) we can obtain a basis for  $H_1(G, \mathbb{Z})$  consisting only of simple cycles by picking any spanning forest  $F$  of  $G$  and then using as basis elements the fundamental cycles  $C_e$  of the edges  $e \in E \setminus F$ . This justifies step 4.

Let  $(i, j)$  be an edge of  $G$ . Define an  $i$ - $j$  path (shortly, just a path) to be a subgraph  $P$  such that, for generic rank one  $A$ ,  $L_P(A) = -x_{(i,j)}$ ; the set of all  $i$ - $j$  paths is the  $i$ - $j$  path space. By Theorem 2.6, we can write any path as a  $\mathbb{Z}$ -linear combination of  $x_{(i,j)}$  and oriented cycles. From this, we see that the rank of the path space is  $\beta_1(G) + 1$  and the graph theoretic identification of elements in the path space with subgraphs that have even degree at every vertex except  $i$  and  $j$ . Thus, if  $(i, j)$  is an edge of  $G$ , step 5 is justified, completing the proof of correctness in this case.

If  $(i, j)$  was not an edge, step 1 guarantees that the dummy copy of  $(i, j)$  that we added is not in the spanning tree computed in step 3. Thus, the element  $P_{(i,j)} = C_{(i,j)} - x_{(i,j)}$  computed in step 6 is a simple path from  $i$  to  $j$ . The collection of elements generated in step 6 is independent by the same fact in  $H_1(G \cup \{(i, j)\}, \mathbb{Z})$  and has rank  $\beta_1(G) + 1$ . Since none of the elements put a non-zero coefficient on the dummy generator  $x_{(i,j)}$ , we are done.  $\square$
